# Supplementary material for: Procalcitonin Increase Is Associated with the Development of Critical Care-Acquired Infections in COVID-19 ARDS
Source: MDPI journal article supplement (doi:10.3390/antibiotics10111425), 2021-11-22
Supplement: s1 [file s1]

## Article

# Procalcitonin Increase Is Associated with the Development of Critical Care-Acquired Infections in COVID-19 ARDS

Owen Richards <sup>1,†</sup>, Philip Pallmann <sup>2,†</sup>, Charles King <sup>1</sup>, Yusuf Cheema <sup>1</sup>, Charlotte Killick <sup>1</sup>, Emma Thomas-Jones <sup>2</sup>, Jessica Harris <sup>3</sup>, Catherine Bailey <sup>3</sup> and Tamas Szakmany <sup>4,5,\*</sup>

<sup>1</sup> School of Medicine, Cardiff University, Cardiff, CF14 4XN, UK; richardso3@cardiff.ac.uk (O.R.); kingc20@cardiff.ac.uk (C.K.); cheemaya@cardiff.ac.uk (Y.C.); killickcj@cardiff.ac.uk (C.K.)

<sup>2</sup> Centre for Trials Research, Cardiff University, Cardiff, CF14 4XN, UK; pallmannp@cardiff.ac.uk (P.P.); thomas-jonese@cardiff.ac.uk (E.T.-J.)

<sup>3</sup> Department of Clinical Biochemistry, Grange University Hospital, Aneurin Bevan University Health Board, Cwmbran, NP44 2XJ, UK; jessica.harris2@wales.nhs.uk (J.H.); catherine.bailey2@wales.nhs.uk (C.B.)

<sup>4</sup> Department of Anaesthesia, Intensive Care and Pain Medicine, Cardiff University, Cardiff, CF14 4XN, UK

<sup>5</sup> Critical Care Directorate, Grange University Hospital, Aneurin Bevan University Health Board, Cwmbran, NP44 2XJ, UK

\* Correspondence: szakmany1@cardiff.ac.uk

† These authors contributed equally to this work

## Supplementary Materials

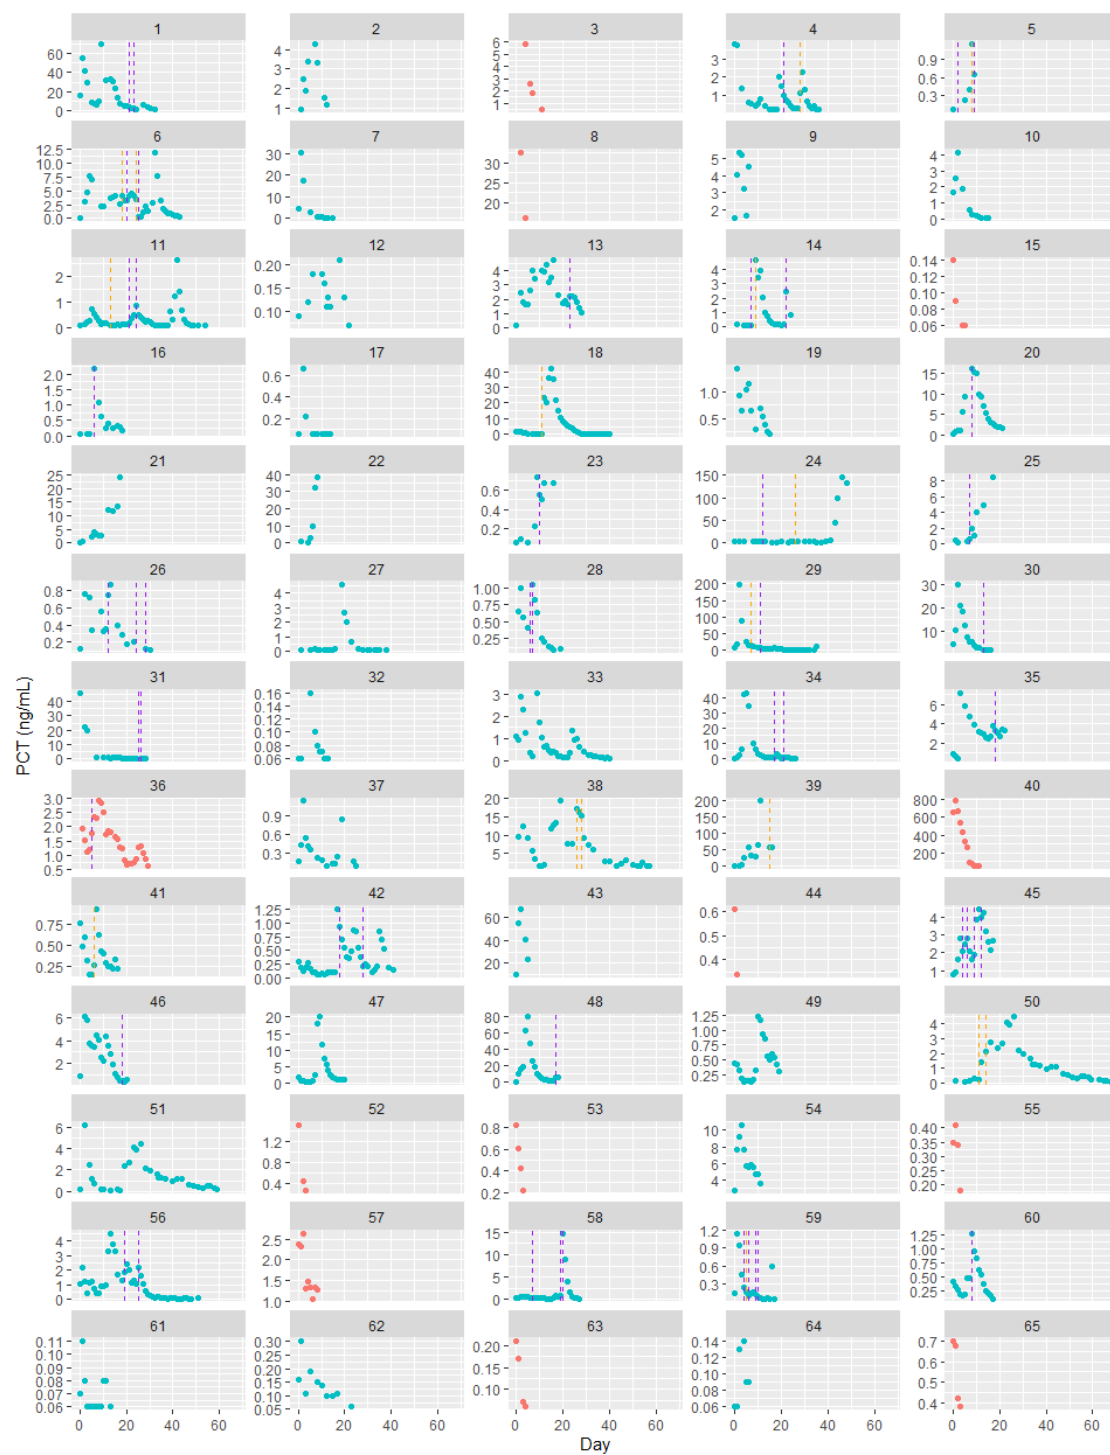

**Figure S1.** PCT trajectories over time for individual patients (in ng/mL). Green=PCT rise; red=no PCT rise. Purple=VAP/VAT event; orange=LCBI event. NB: y-axis scales are vastly different.

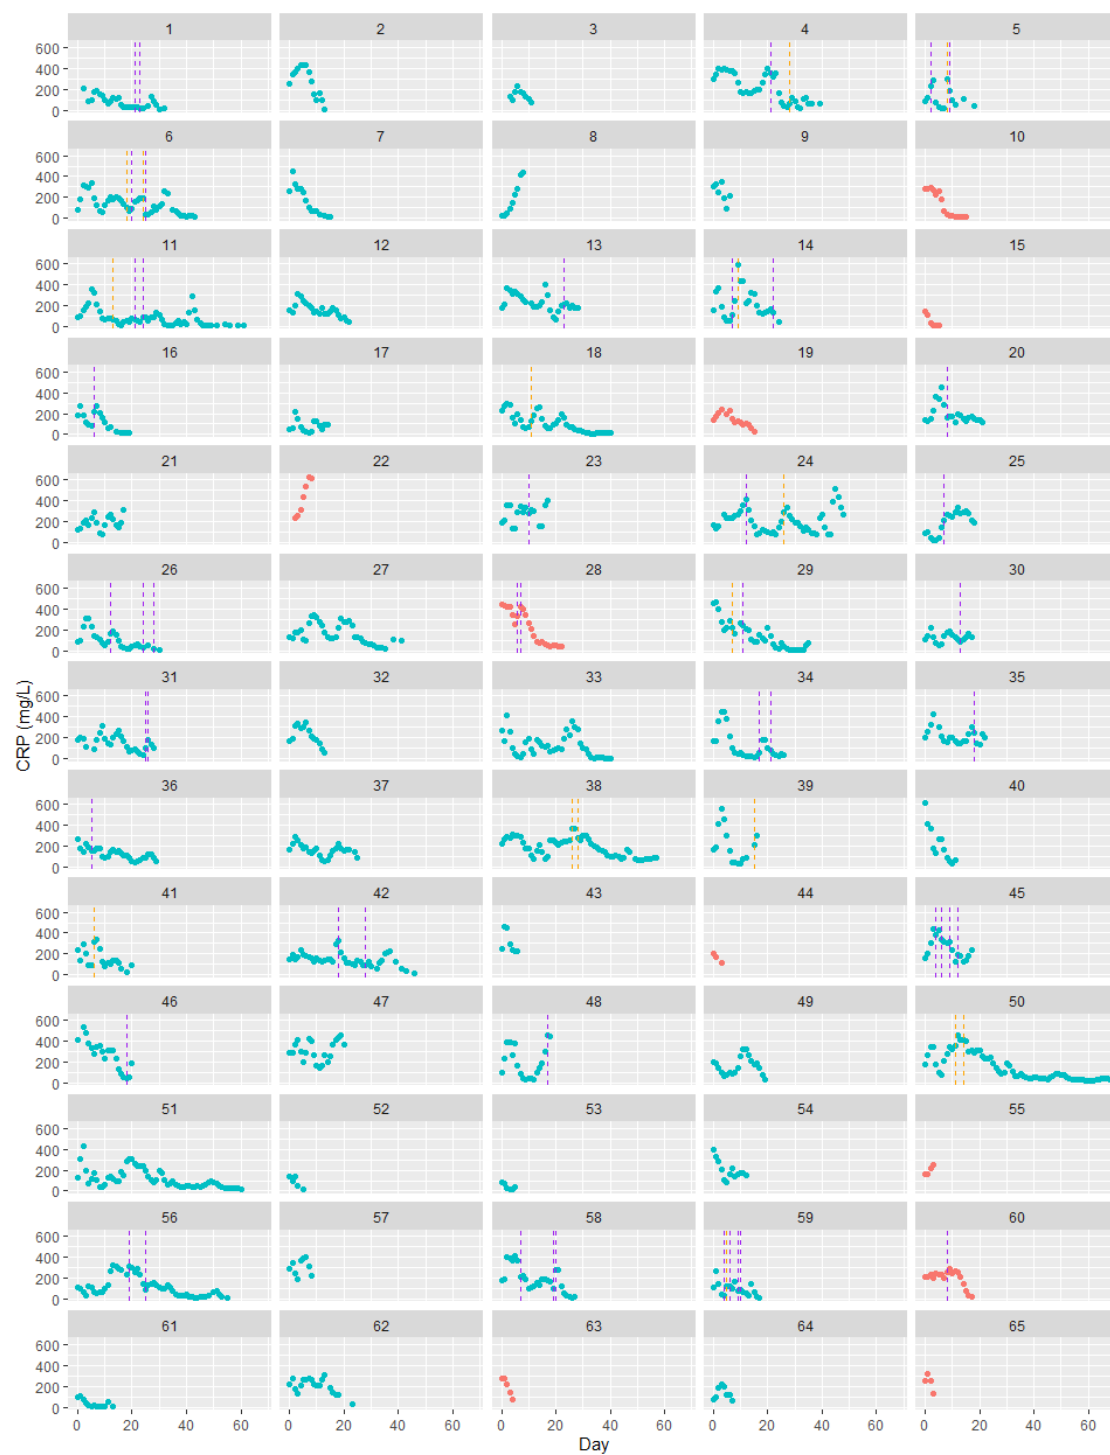

**Figure S2.** CRP trajectories over time for individual patients (in mg/L). Green=CRP rise; red=no CRP rise. Purple=VAP/VAT event; orange=LCBI event.

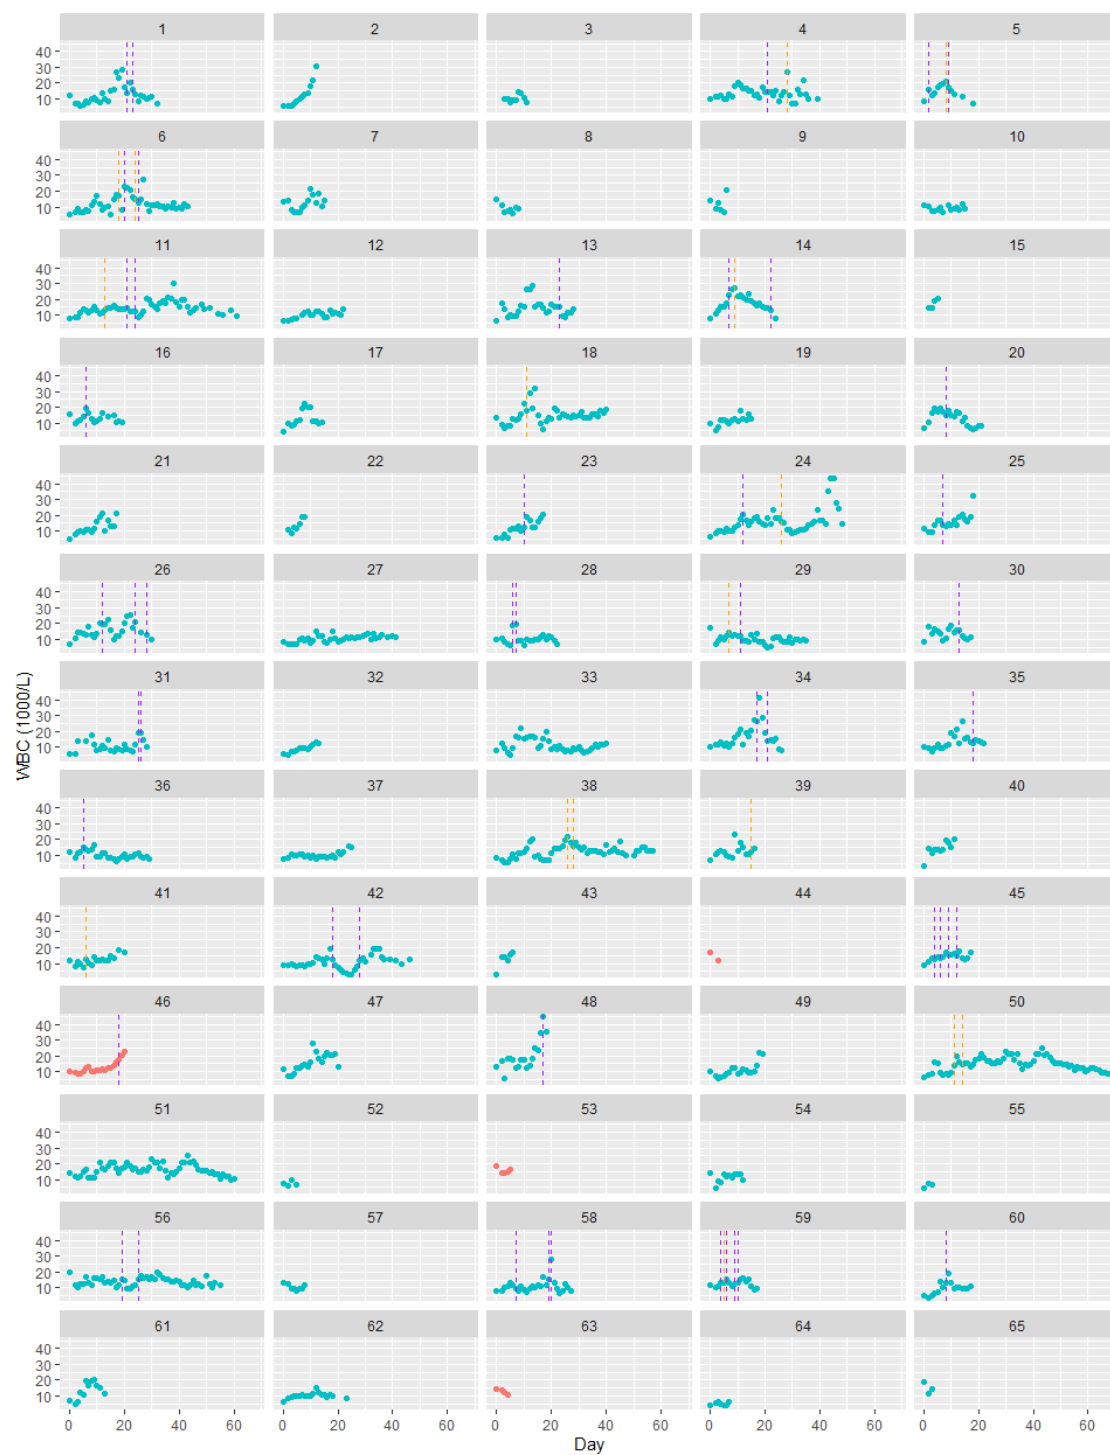

**Figure S3.** WBC trajectories over time for individual patients (in 1000/L). Green=WBC rise; red=no WBC rise. Purple=VAP/VAT event; orange=LCBI event.

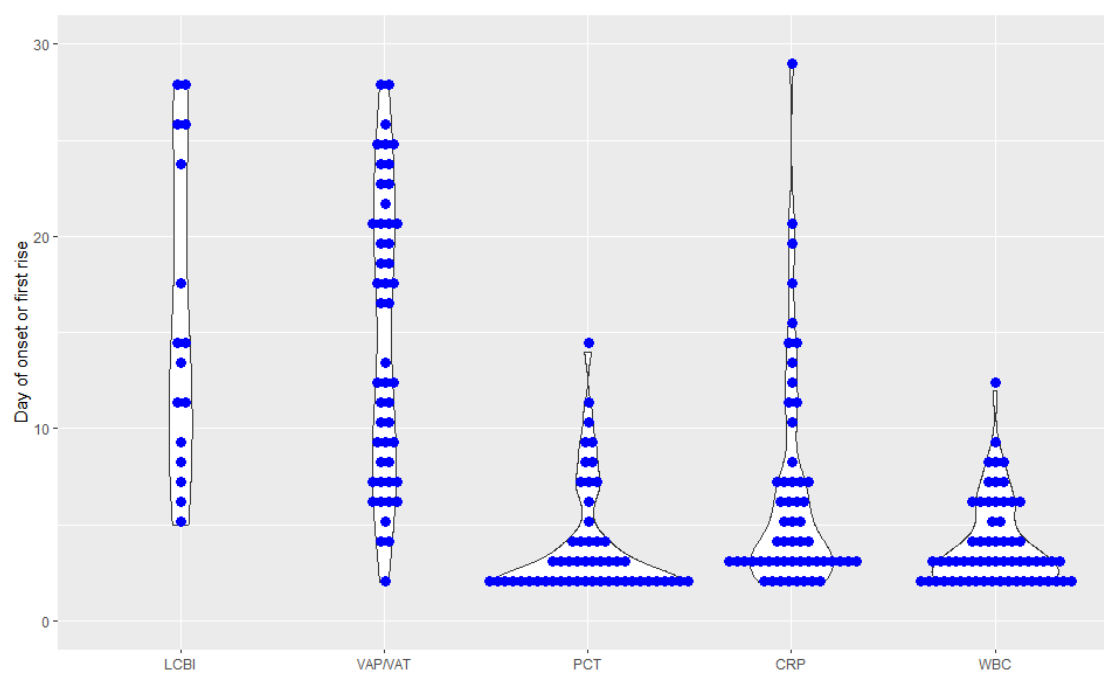

**Figure S4.** Violin plots for days of LCBI and VAP/VAT onset and first biomarker rise.
